# Supplementary material
Source: HighWire-hosted journal article supplement (https://www.rsfjournal.org/content/suppl/2020/07/16/6.2.67)
Supplement: RoccoKelly-appendix.pdf [file RoccoKelly-appendix.pdf]

## Appendix

Table A1. Documents Analyzed in Qualitative Evidence Synthesis (n=74)

### Federally Qualified Health Center Advanced Primary Care Practice Demonstration (FQHC ACP)

1. Final First Annual Report, <https://innovation.cms.gov/Files/reports/HCIA-BHSA-FirstEvalRpt.pdf>
2. Second Annual Report, <https://innovation.cms.gov/Files/reports/fqhc-scndevalrpt.pdf>
3. Final Report, <https://downloads.cms.gov/files/cmimi/fqhc-finalevalrpt.pdf>

### Advance Payment ACO Model

1. Evaluation of CMMI Accountable Care Organization Initiatives: Advance Payment ACO Final Report, <https://innovation.cms.gov/Files/reports/advpayaco-fnevalrpt.pdf>

### Health Care Innovation Awards, Round 1

1. Behavioral Health/Substance Abuse Awards: First Annual Report, <https://innovation.cms.gov/Files/reports/HCIA-BHSA-FirstEvalRpt.pdf>
2. Behavioral Health/Substance Abuse Awards: Second Annual Report, <https://innovation.cms.gov/Files/reports/hcia-bhsa-secondevalrpt.pdf>
3. Behavioral Health/Substance Abuse Awards: Third Annual Report, <https://downloads.cms.gov/files/cmimi/hcia-bhsa-thirdannualrpt.pdf>
4. HCIA Complex/High-Risk Patient Targeting: First Annual Report, <https://innovation.cms.gov/Files/reports/HCIA-CHSPT-FirstEvalRpt.pdf>
5. HCIA Complex/High-Risk Patient Targeting: Second Annual Report, <https://downloads.cms.gov/files/cmimi/hcia-complexhighriskpattargeting-secondevalrpt.pdf>
6. HCIA Complex/High-Risk Patient Targeting: Third Annual Report, <https://downloads.cms.gov/files/cmimi/hcia-chspt-thirdannualrpt.pdf>
7. Community Resource Planning, Prevention, and Monitoring, First Annual Report, [https://downloads.cms.gov/files/cmimi/HCIA-CommunityRPPM-FirstEvalRpt\\_4\\_9\\_15.pdf](https://downloads.cms.gov/files/cmimi/HCIA-CommunityRPPM-FirstEvalRpt_4_9_15.pdf)
8. Community Resource Planning, Prevention, and Monitoring, Second Annual Report, <https://downloads.cms.gov/files/cmimi/hcia-communityrppm-secondevalrpt.pdf>
9. <https://downloads.cms.gov/files/cmimi/hcia-communityrppm-secondevalrpt.pdf>
10. Community Resource Planning, Prevention, and Monitoring, Third Annual Report, <https://downloads.cms.gov/files/cmimi/hcia-communityrppm-thirdannualrpt.pdf>
11. HCIA: Disease-Specific Evaluation, First Annual Report, <https://innovation.cms.gov/Files/reports/HCIA-DS-FirstEvalRpt.pdf>
12. HCIA: Disease-Specific Evaluation, Second Annual Report, <https://downloads.cms.gov/files/cmimi/hcia-diseasespecific-secondevalrpt.pdf>
13. HCIA: Disease-Specific Evaluation, Third Annual Report, <https://downloads.cms.gov/files/cmimi/hcia-diseasespecific-thirdannualrpt.pdf>
14. Community Resource Planning, Prevention, and Monitoring, Annual Report 2015, Awardee-Level Findings, YMCA of the USA, <https://innovation.cms.gov/Files/reports/hcia-ymcadpp-evalrpt.pdf>

15. Evaluation of Hospital-Setting HCIA Awards, First Annual Report, [https://downloads.cms.gov/files/cmimi/HCIA-HospitalSetting-FirstEvalRpt\\_4\\_9\\_15.pdf](https://downloads.cms.gov/files/cmimi/HCIA-HospitalSetting-FirstEvalRpt_4_9_15.pdf)
16. Evaluation of Hospital-Setting HCIA Awards, Second Annual Report, <https://downloads.cms.gov/files/cmimi/hcia-hospitalsetting-secondevalrpt.pdf>
17. Evaluation of Hospital-Setting HCIA Awards, Third Annual Report, <https://downloads.cms.gov/files/cmimi/hcia-hospitalsetting-thirdannualrpt.pdf>
18. Evaluation of Health Care Innovation Awards: Primary Care Redesign Programs, First Annual Report, <https://innovation.cms.gov/Files/reports/HCIA-PCRP-FirstEvalRpt.pdf>
19. Evaluation of Health Care Innovation Awards: Primary Care Redesign Programs, Second Annual Report, <https://downloads.cms.gov/files/cmimi/hcia-primarycareredesignprog-secondannualrpt.pdf>
20. Evaluation of Health Care Innovation Awards: Primary Care Redesign Programs, Third Annual Report, <https://downloads.cms.gov/files/cmimi/hcia-primarycareredesign-thirdannualrpt.pdf>
21. Shared Decision Making and Medication Management, First Annual Report, <https://innovation.cms.gov/Files/reports/HCIA-SDM-FirstEvalRpt.pdf>
22. Shared Decision Making and Medication Management, Second Annual Report, <https://downloads.cms.gov/files/cmimi/hcia-shareddecisionmakingmedicationmnmgt-secondevalrpt.pdf>
23. Shared Decision Making, Third Annual Report, <https://downloads.cms.gov/files/cmimi/hcia-shareddecisionmaking-thirdannualrpt.pdf>
24. Medication Management, Third Annual Report, <https://downloads.cms.gov/files/cmimi/hcia-medicationmanagement-thirdannualrpt.pdf>
25. Meta-Analysis and Evaluators Collaborative, First Annual Report, <https://innovation.cms.gov/Files/reports/hcia-metaanalysis-evalcollab.pdf>
26. Meta-Analysis and Evaluators Collaborative, Second Annual Report, <https://downloads.cms.gov/files/cmimi/hcia-metaanalysissecondannualrpt.pdf>
27. Meta-Analysis and Evaluators Collaborative, Third Annual Report, <https://downloads.cms.gov/files/cmimi/hcia-medicationmanagement-thirdannualrpt.pdf>
28. Innovation Center State-Based Initiatives: A Systematic Review of Lessons Learned, <https://innovation.cms.gov/Files/reports/statebasedinitiatives-lessonslearned.pdf>
29. Certification of the Medicare Diabetes Prevention Program, <https://www.cms.gov/Research-Statistics-Data-and-Systems/Research/ActuarialStudies/Downloads/Diabetes-Prevention-Certification-2016-03-14.pdf>
30. Request for Determination of Eligibility for Expansion of Diabetes Prevention Program. <https://innovation.cms.gov/Files/x/mdpp-certification.pdf>
31. “Medicare Program; Revisions to Payment Policies Under the Physician Fee Schedule and Other Revisions to Part B for CY 2017; Medicare Advantage Bid Pricing Data Release; Medicare Advantage and Part D Medical Loss Ratio Data Release; Medicare Advantage Provider Network Requirements; Expansion of Medicare Diabetes Prevention Program Model; Medicare Shared Savings Program Requirements.” *Federal Register* 81, no. 220 (November 15, 2016): 80170–80562.

#### Health Care Innovation Awards, Round 2

1. First Annual Report, <https://downloads.cms.gov/files/cmimi/hcia2-yroneevalrpt.pdf>
2. Second Annual Report, <https://downloads.cms.gov/files/cmimi/hcia2-yrtwoannualrpt.pdf>

3. Third Annual Report, <https://downloads.cms.gov/files/cmimi/hcia2-yr3evalrpt.pdf>

#### Pioneer ACO Model

1. Year One Evaluation Report, <https://innovation.cms.gov/Files/reports/PioneerACOEvalReport1.pdf>
2. Year One and Year Two Evaluation Report, <https://innovation.cms.gov/Files/reports/PioneerACOEvalRpt2.pdf>
3. Final Evaluation Report, <https://innovation.cms.gov/Files/reports/pioneeraco-finalevalrpt.pdf>
4. Model Certification, <https://www.cms.gov/Research-Statistics-Data-and-Systems/Research/ActuarialStudies/Downloads/Pioneer-Certification-2015-04-10.pdf>
5. “Medicare Program; Medicare Shared Savings Program; Accountable Care Organizations—Pathways to Success and Extreme and Uncontrollable Circumstances Policies for Performance Year 2017.” *Federal Register* 83, no. 249 (December 31, 2018): 67816–68082.
6. “Medicare Program; Medicare Shared Savings Program; Accountable Care Organizations—Revised Benchmark Rebased Methodology, Facilitating Transition to Performance-Based Risk, and Administrative Finality of Financial Calculations.” *Federal Register* 81, no. 112 (June 10, 2016): 37950–38017.

#### Initiative to Reduce Avoidable Hospitalizations among Nursing Facility Residents

1. Evaluation of the Initiative to Reduce Avoidable Hospitalizations among Nursing Facility Residents, Summary of Evaluation as of December 2014, <https://innovation.cms.gov/Files/reports/irahnfr-secondevalrpt.pdf>
2. Evaluation of the Initiative to Reduce Avoidable Hospitalizations among Nursing Facility Residents, Final Year Three Evaluation Report, <https://innovation.cms.gov/Files/reports/irahnfr-finalyrthreeevalrpt.pdf>
3. Evaluation of the Initiative to Reduce Avoidable Hospitalizations among Nursing Facility Residents, Final Year Four Evaluation Report, <https://innovation.cms.gov/Files/reports/irahnfr-finalyrfourvalrpt.pdf>
4. Evaluation of the Initiative to Reduce Avoidable Hospitalizations among Nursing Facility Residents, Final Evaluation Report, <https://downloads.cms.gov/files/cmimi/irahnfr-finalevalrpt.pdf>

#### Comprehensive Primary Care Initiative

1. First Evaluation Report, <https://innovation.cms.gov/Files/reports/CPCI-EvalRpt1.pdf>
2. Second Evaluation Report, <https://innovation.cms.gov/Files/reports/cpci-evalrpt2.pdf>
3. Third Evaluation Report, <https://innovation.cms.gov/Files/reports/cpci-evalrpt3.pdf>
4. Fourth Evaluation Report, <https://downloads.cms.gov/files/cmimi/CPC-initiative-fourth-annual-report.pdf>

#### Bundled Payments for Care Improvement (BPCI), Models 1–4

1. First Evaluation Report, <https://innovation.cms.gov/Files/reports/BPCI-EvalRpt1.pdf>
2. Second Evaluation Report, <https://innovation.cms.gov/Files/reports/bpci-models2-4-yr2evalrpt.pdf>

3. Third Evaluation Report, <https://downloads.cms.gov/files/cmimi/bpci-models2-4yr3evalrpt.pdf>
4. Fourth Evaluation Report, <https://innovation.cms.gov/Files/reports/bpci-models2-4-yr4evalrpt.pdf>
5. Fifth Evaluation Report, <https://downloads.cms.gov/files/cmimi/bpci-models2-4-yr5evalrpt.pdf>

#### State Innovation Models Initiative, Round 1

1. First Annual Report, [https://downloads.cms.gov/files/cmimi/SIM-Round1-ModelTest-FirstAnnualRpt\\_5\\_6\\_15.pdf](https://downloads.cms.gov/files/cmimi/SIM-Round1-ModelTest-FirstAnnualRpt_5_6_15.pdf)
2. Second Annual Report, <https://downloads.cms.gov/files/cmimi/sim-round1-secondannualrpt.pdf>
3. Third Annual Report, <https://downloads.cms.gov/files/cmimi/sim-rd1mt-thirdannrpt.pdf>
4. Fourth Annual Report, <https://downloads.cms.gov/files/cmimi/sim-rd1-mt-fourthannrpt.pdf>
5. Fifth Annual Report, <https://downloads.cms.gov/files/cmimi/sim-rd1-mt-fifthannrpt.pdf>

#### State Innovation Models Initiative, Round 2

1. First Annual Report, <https://downloads.cms.gov/files/cmimi/sim-round2test-firstannrpt.pdf>
2. Second Annual Report, <https://downloads.cms.gov/files/cmimi/sim-round2test-secondannrpt.pdf>
3. Third Annual Report, <https://downloads.cms.gov/files/cmimi/sim-rd2-test-ar3.pdf>

#### Strong Start for Mothers and Newborns: Enhanced Prenatal Care Models

1. Year One Evaluation Report, <https://innovation.cms.gov/Files/reports/strongstart-enhancedprenatal-yr1evalrpt.pdf>
2. Year Two Evaluation Report (vol. 1), [https://downloads.cms.gov/files/cmimi/strongstart-enhancedprenatalcare\\_evalrptyr2v1.pdf](https://downloads.cms.gov/files/cmimi/strongstart-enhancedprenatalcare_evalrptyr2v1.pdf)
3. Year Two Evaluation Report (vol. 2), [https://downloads.cms.gov/files/cmimi/strongstart-enhancedprenatalcare\\_evalrptyr2v2.pdf](https://downloads.cms.gov/files/cmimi/strongstart-enhancedprenatalcare_evalrptyr2v2.pdf)
4. Year Three Evaluation Report (vol. 1), [https://downloads.cms.gov/files/cmimi/strongstart-enhancedprenatalcare\\_evalrptyr3v1.pdf](https://downloads.cms.gov/files/cmimi/strongstart-enhancedprenatalcare_evalrptyr3v1.pdf)
5. Year Three Evaluation Report (vol. 2), [https://downloads.cms.gov/files/cmimi/strongstart-enhancedprenatalcare\\_evalrptyr3v2.pdf](https://downloads.cms.gov/files/cmimi/strongstart-enhancedprenatalcare_evalrptyr3v2.pdf)
6. Year Four Evaluation Report (vol. 1), [https://downloads.cms.gov/files/cmimi/strongstart-enhancedprenatalcaremodels\\_evalrptyr4v1.pdf](https://downloads.cms.gov/files/cmimi/strongstart-enhancedprenatalcaremodels_evalrptyr4v1.pdf)
7. Year Four Evaluation Report (vol. 2), [https://downloads.cms.gov/files/cmimi/strongstart-enhancedprenatalcaremodels\\_evalrptyr4v2.pdf](https://downloads.cms.gov/files/cmimi/strongstart-enhancedprenatalcaremodels_evalrptyr4v2.pdf)
8. Final Evaluation Report (vol. 1), <https://downloads.cms.gov/files/cmimi/strongstart-prenatal-finalevalrpt-v1.pdf>
9. Final Evaluation Report (vol. 2), <https://downloads.cms.gov/files/cmimi/strongstart-prenatal-finalevalrpt-v2.pdf>
